# Supplementary material for: Tetracycline: structural characterization and antimicrobial properties of its water-soluble di-anionic bi-sodium salt
Source: Royal Society of Chemistry journal article supplement (doi:10.1039/d4dt01384k), 2024-01-01
Supplement: d4dt01384k1.pdf [file d4dt01384k1.pdf]

## Supplementary Material Information

### **Tetracycline; Structural characterization and antimicrobial properties of its water-soluble di-anionic bi-sodium salt**

Afroditi S. Tsigara<sup>1</sup>, Christina N. Banti<sup>1,\*</sup>, Antonios Hatzidimitriou<sup>2</sup>, Sotiris K. Hadjikakou<sup>1,\*</sup>

<sup>1</sup> Biological Inorganic Chemistry Laboratory, Department of Chemistry, University of Ioannina,  
45110 Ioannina, Greece;

<sup>2</sup> Laboratory of Inorganic Chemistry, School of Chemistry, Aristotle University of  
Thessaloniki, Thessaloniki 54124, Greece

\*All correspondence should be addressed to:

Dr. C.N. Banti (Adjunct Lecturer, Post Doctoral Fellow); email: [cbanti@uoi.gr](mailto:cbanti@uoi.gr)

Dr. S.K. Hadjikakou (Professor) e-mail: [shadjika@uoi.gr](mailto:shadjika@uoi.gr) , tel.:xx30-26510-08374,

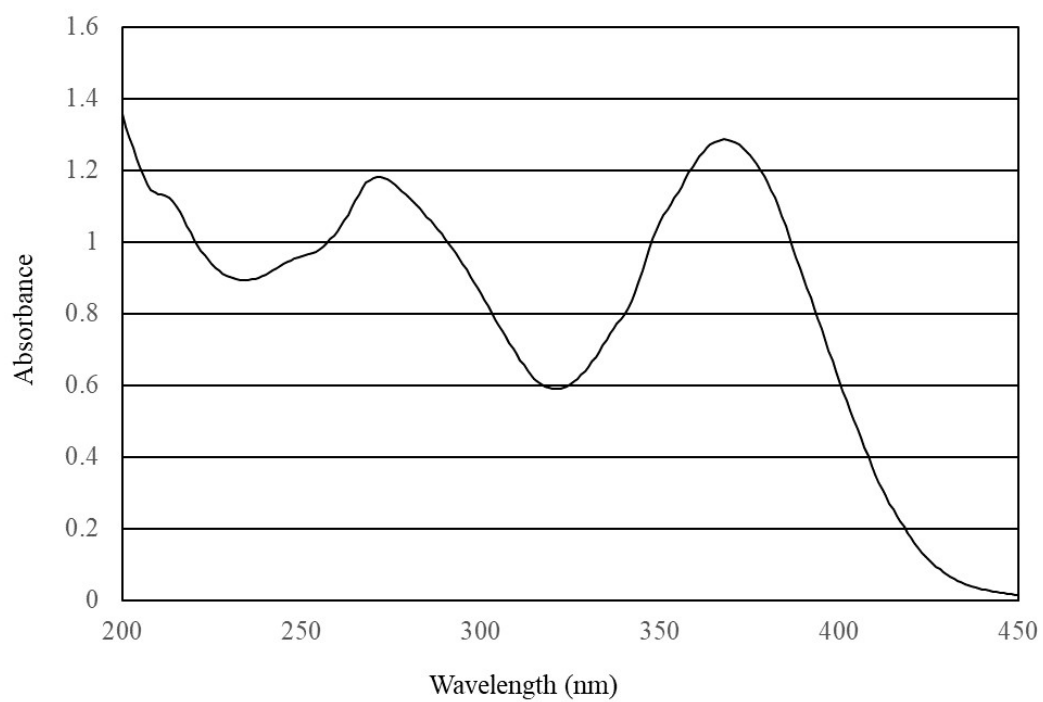

**Figure S1.** UV-Vis spectrum of TCNa ( $10^{-4}$  M) in ddH<sub>2</sub>O.

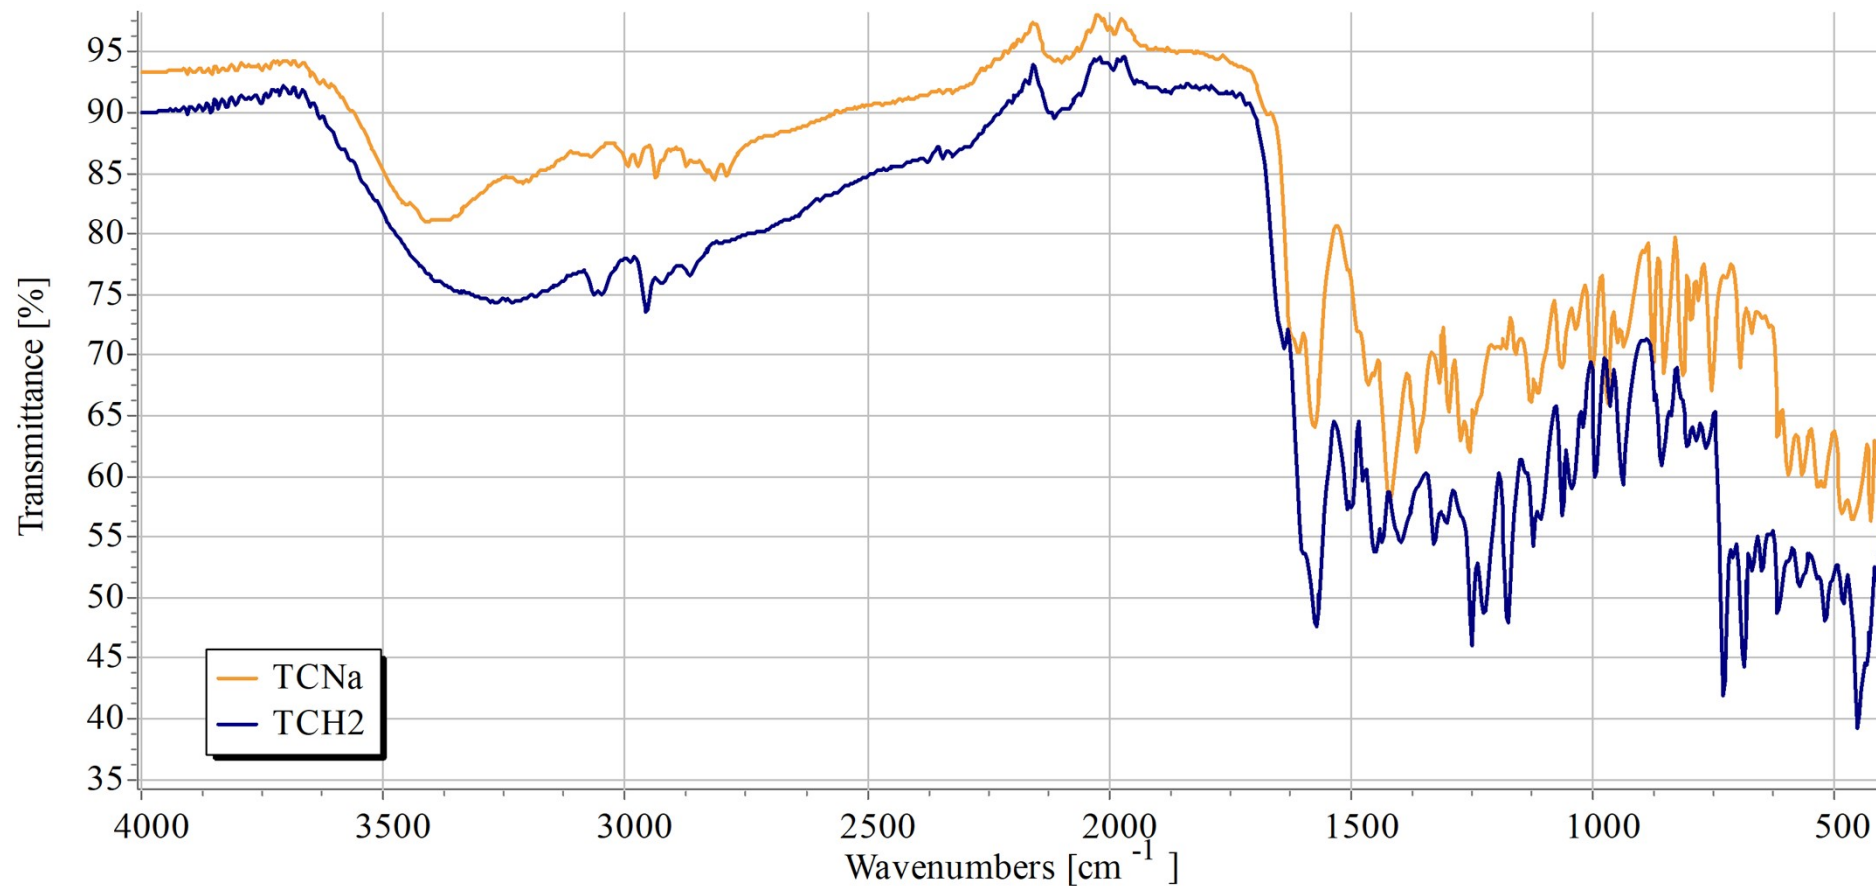

**Figure S2.** FT-IR spectra of TCNa and TCH<sub>2</sub>.

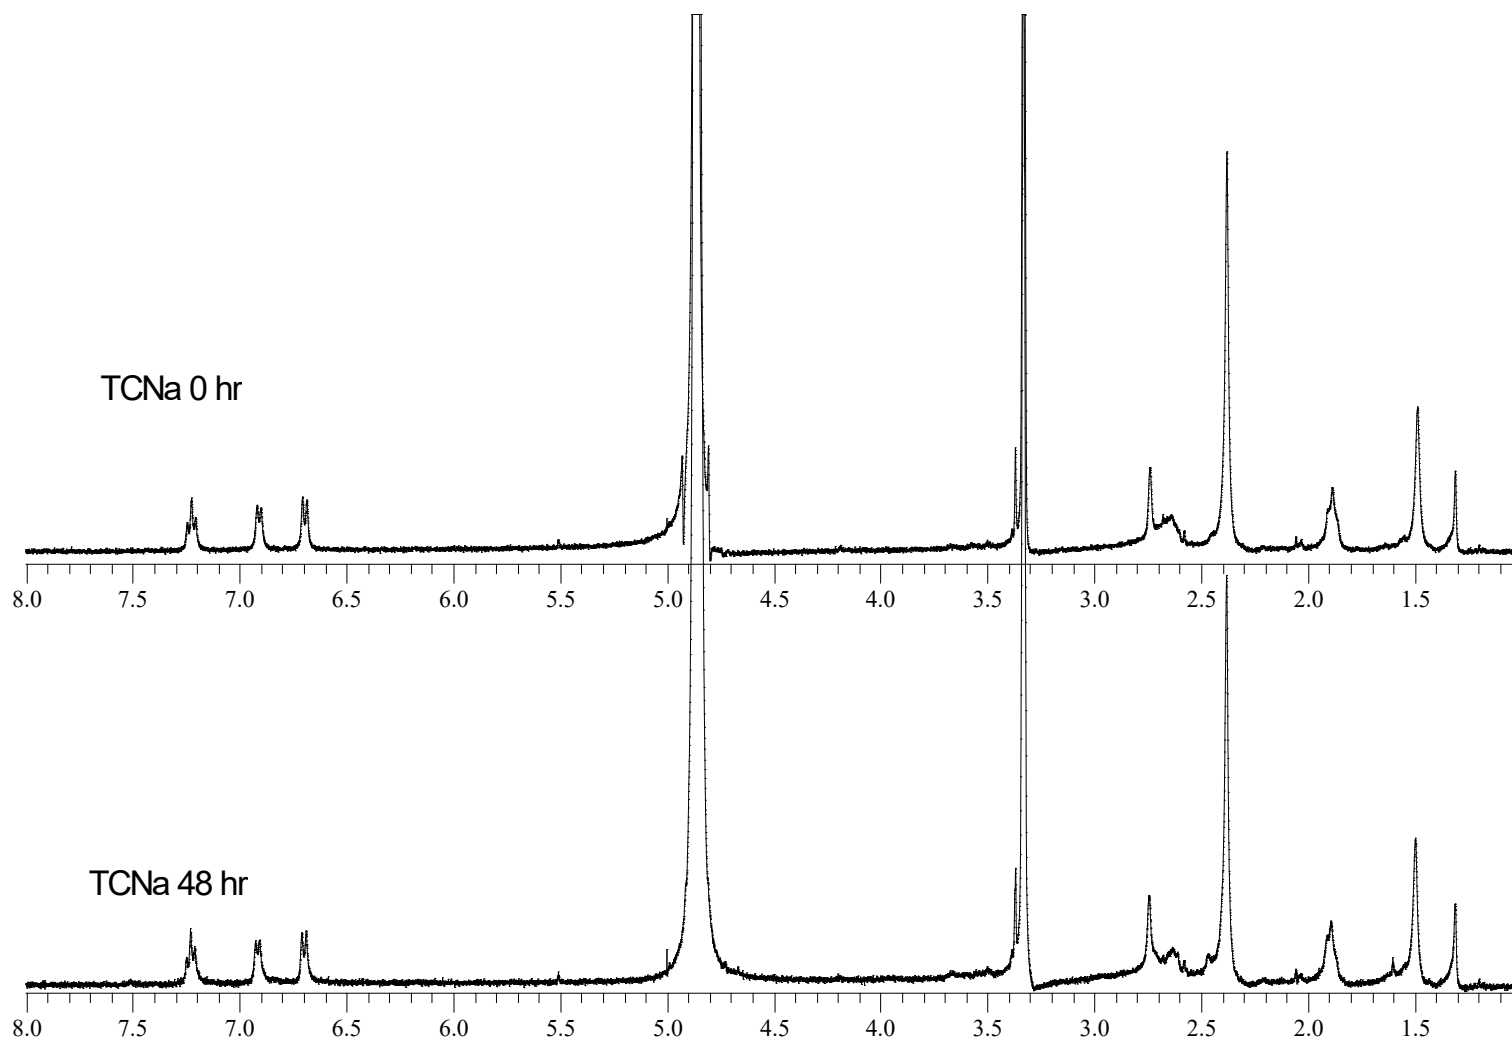

**Figure S3.**  $^1\text{H-NMR}$  spectra of TCNa in  $\text{MeOH-}d_4$  at 0 and 48 hours

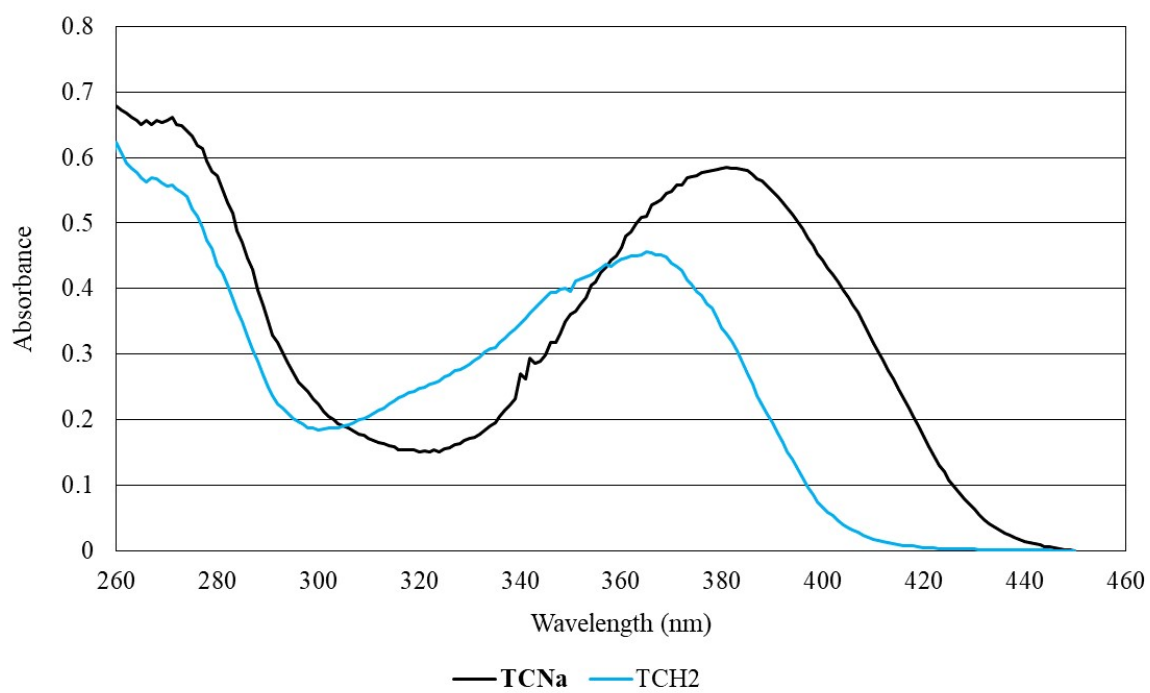

**Figure S4.** UV-Vis spectra of **TCNa** ( $10^{-4}$  M) and **TCH<sub>2</sub>** ( $10^{-3}$  M) in DMSO.

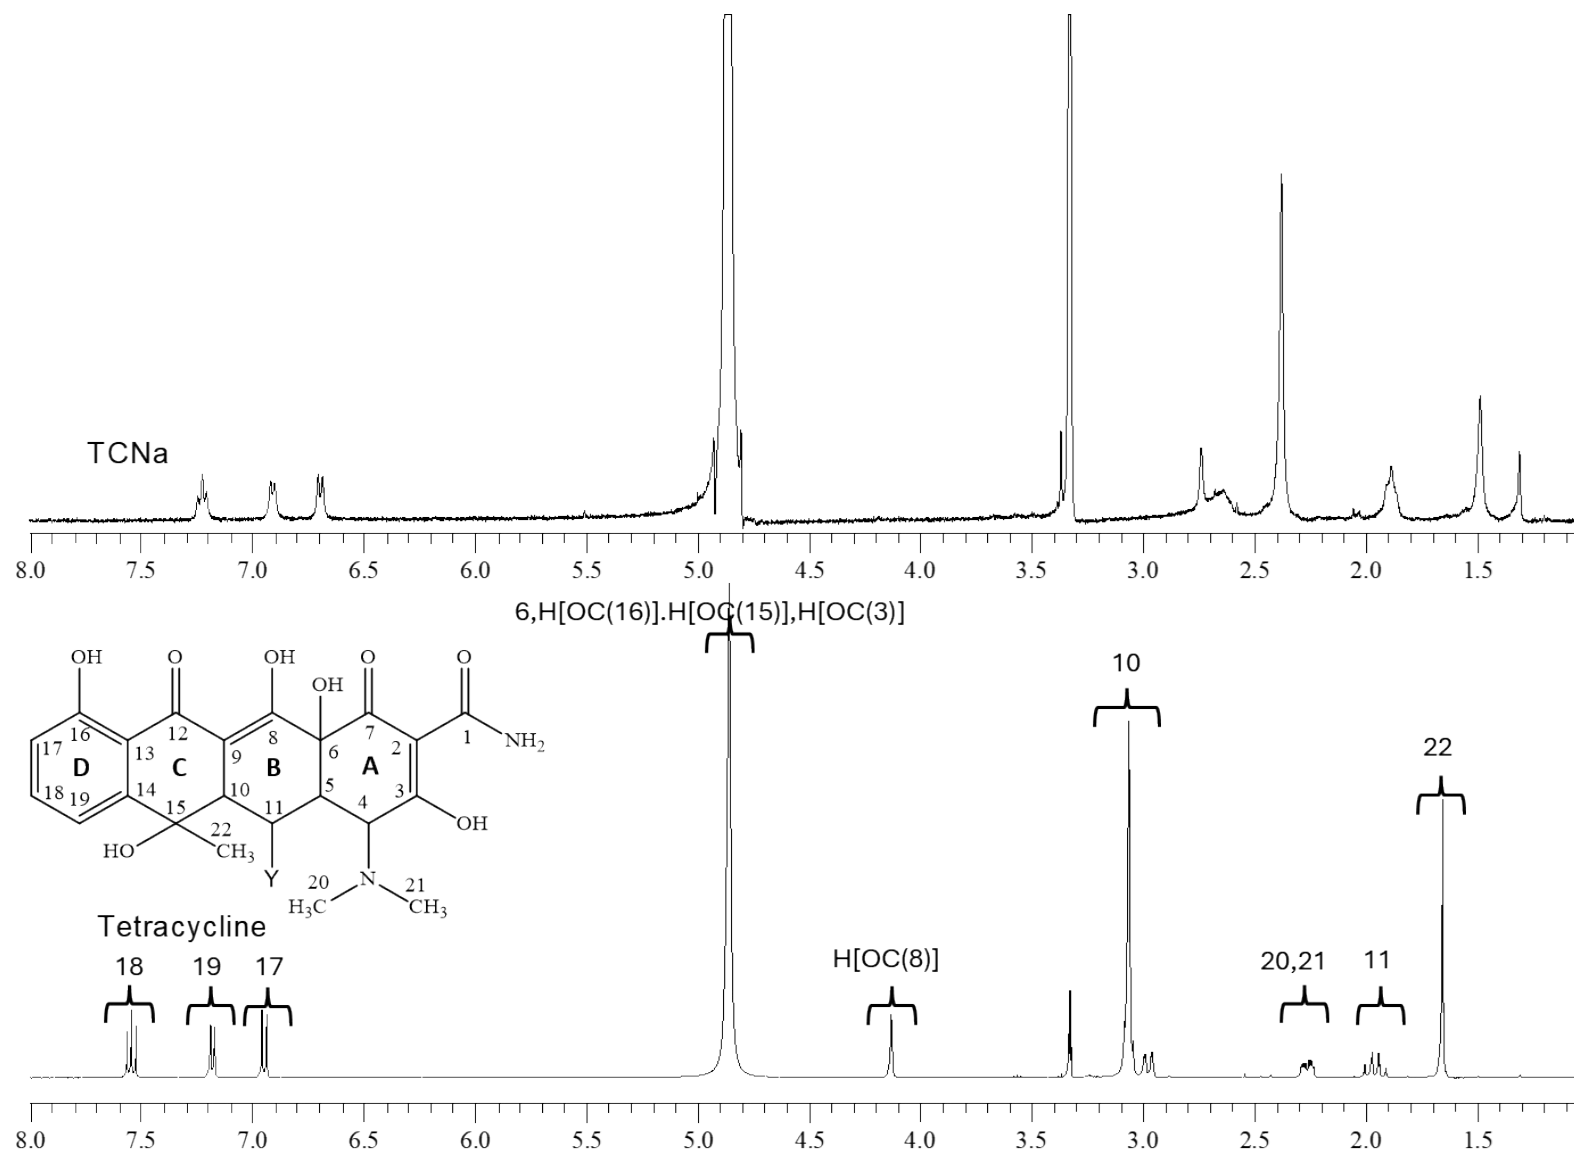

**Figure S5.**  $^1\text{H-NMR}$  spectra of TCNa and TCH<sub>2</sub> in MeOH-*d*<sub>4</sub>

*P. aeruginosa*

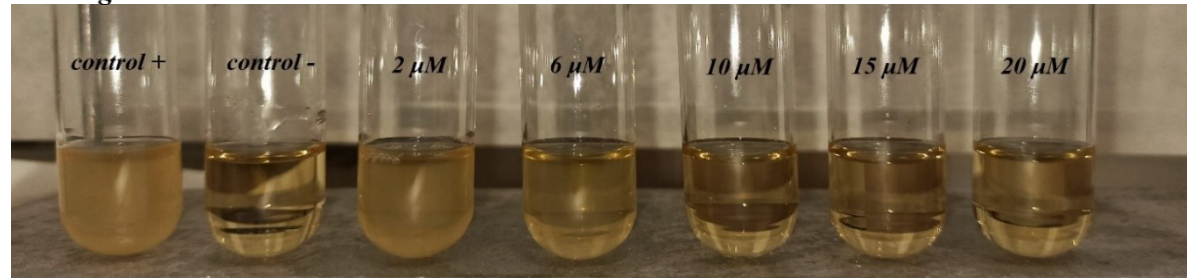

*E. coli*

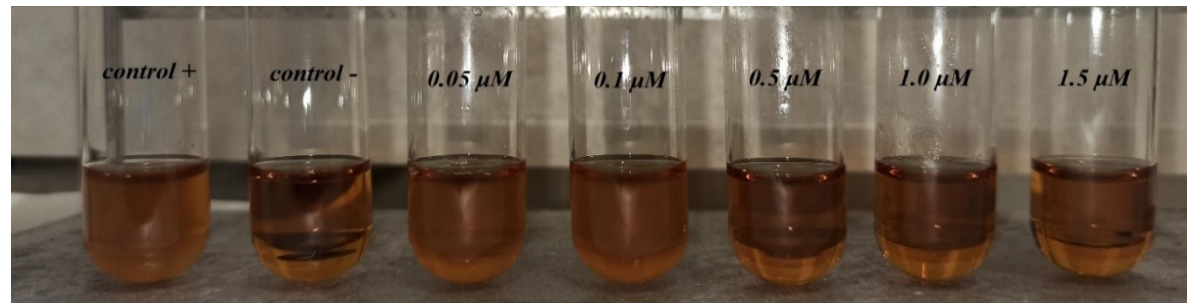

*S. epidermidis*

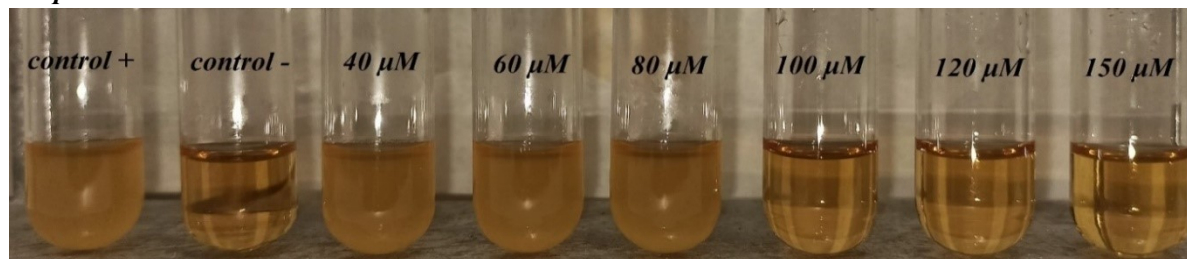

*S. aureus*

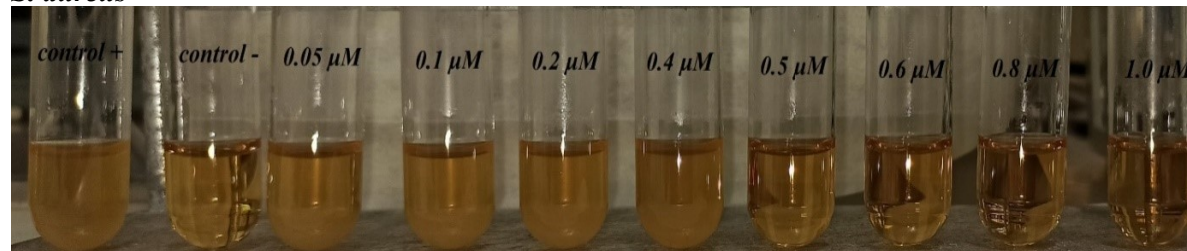

**Figure S6.** Minimum Inhibitory Concentration of TCNa against *P. aeruginosa*, *E. coli*, *S. epidermidis* and *S. aureus*.

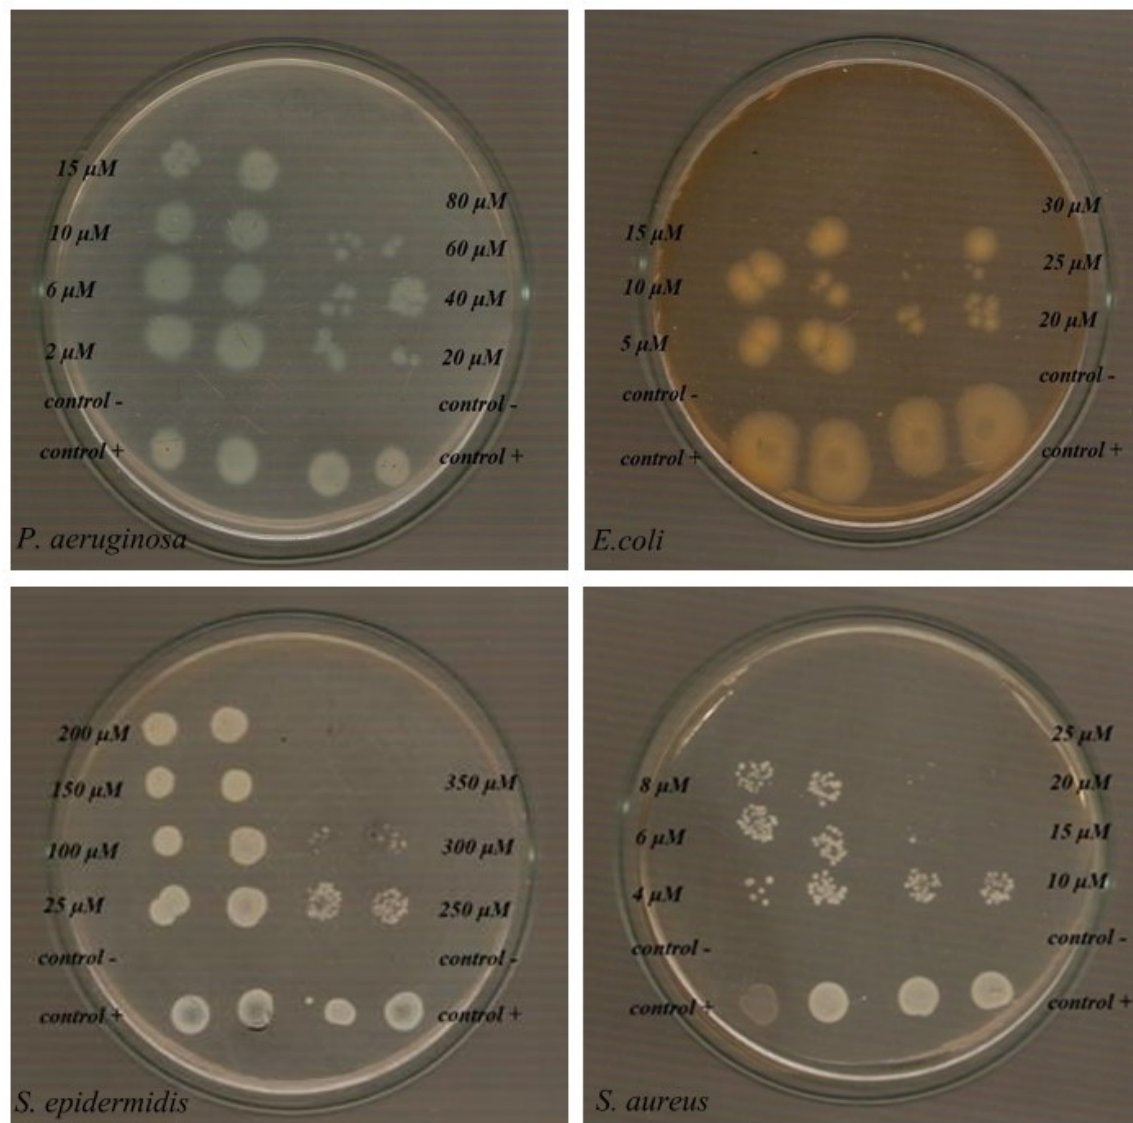

**Figure S7.** Minimum bactericidal concentration of TCNa against *P. aeruginosa*, *E. coli*, *S. epidermidis* and *S. aureus*



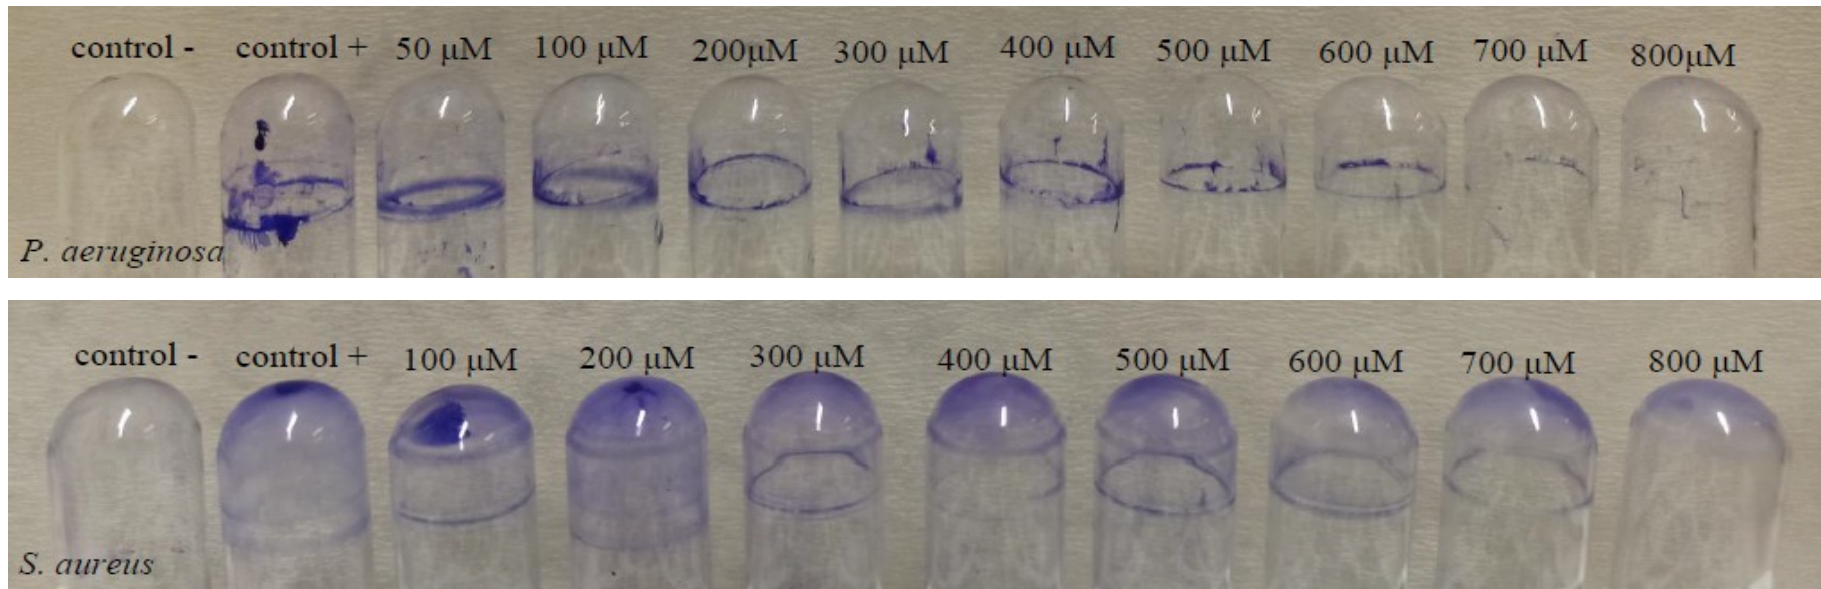

**Figure S8.** *P. aeruginosa* and *S. aureus* biofilms stained by crystal violet under increasing concentrations of TCNa and TCH<sub>2</sub>.
